# Supplementary material
Source: PubMed Central journal article supplement (PMC2486287)
Supplement: pbio.0060161.st001.pdf [file pbio.0060161.st001.pdf]

Table S1

| Gene                | Forward oligo |                        | Reverse oligo |                       |
|---------------------|---------------|------------------------|---------------|-----------------------|
|                     | Name          | Sequence               | Name          | Sequence              |
| PAG3                | 155           | GCAAATGCTCCTCTTCTCC    | 156           | TGGCTGCCGAAGCAAGCG    |
| Actin               | 150           | CGGACGAGGAACAAACTGC    | 151           | TTTCCATGTCATCCCAATTGG |
| $\beta$ -Tubulin    | 142           | TTCAGGCTGGCCAATGCG     | 143           | TACGGAGTCCATTGTACCTG  |
| VSG 221 / MiTat1.2  | 74            | AGCAGCCAAGAGGTAACAGC   | 82            | CAACTGCAGCTTGCAAGGAA  |
| VSG 13 / MiTat1.13  | 78            | ATAACGCATGGCCATCTTGAC  | 79            | GTCGTTGCTGTGGATTGCTC  |
| VSG 224 / MiTat1.3  | 52            | GACGCAGCAGAATCAACAC    | 45            | GCTTATTTTGTGTCTGTCGC  |
| VSG VO2 / MiTat1.9  | 51            | ACTAAGCTCGTGGCGCAC     | 141           | CGCGTAGTTGACGCATGAC   |
| VSG 800 / MiTat1.18 | 117           | ACAGACCGCCGACAGTATC    | 140           | GTATCTTTGTAGGCCGCTGC  |
| NEO                 | 77            | CTTGCCGAATATCATGGTGGGA | 83            | ACCGTAAAGCACGAGGAAGC  |
